# Supplementary material for: Combined MEK and JAK/STAT3 pathway inhibition effectively decreases SHH medulloblastoma tumor progression
Source: PubMed Central journal article supplement (PMC9283517; doi:10.1038/s42003-022-03654-9), 2022-07-14
Supplement: 42003_2022_3654_MOESM3_ESM.pdf [file 42003_2022_3654_MOESM3_ESM.pdf]

## Description of Additional Supplementary Files

**File name:** Supplementary Data 1-10

**Description:** All tables representing RNA seq and digital spatial profiling data depicted in figures.

**File name:** Supplementary Data 11

**Description:** All source data underlying the graphs and charts presented in main figures.
